# Supplementary material
Source: PubMed Central journal article supplement (PMC1464325)

**A**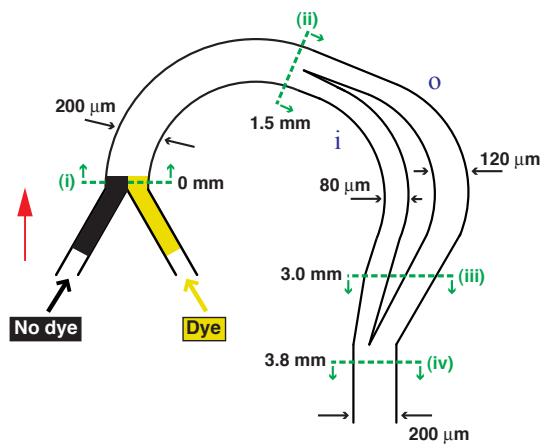**B**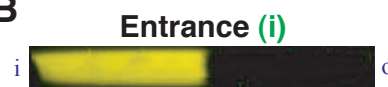**C**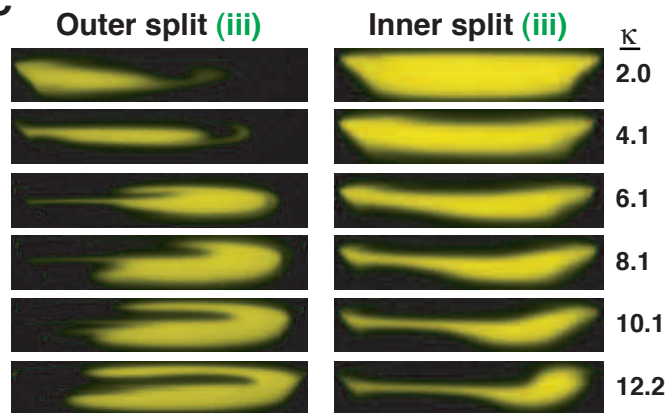**D**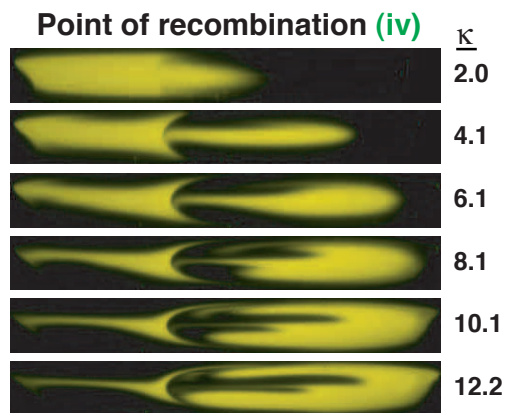**E**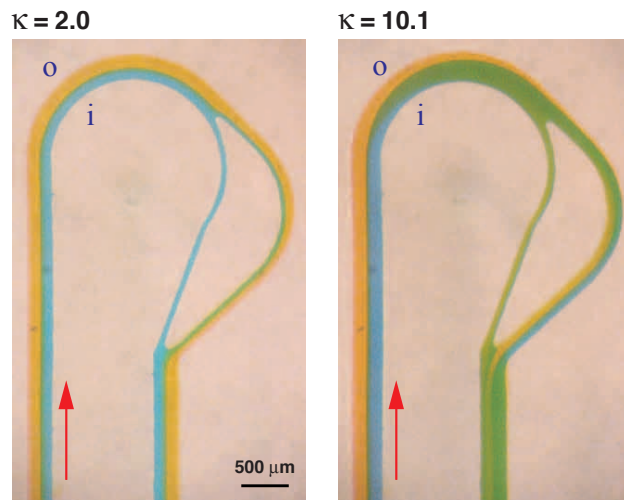

Supplement: pnas_0507976103_1.pdf [file pnas_0507976103_1.pdf]

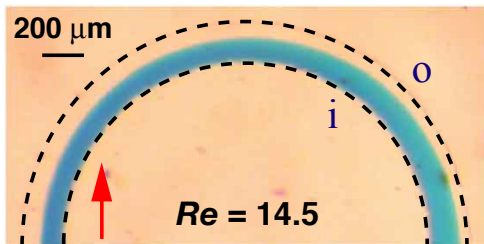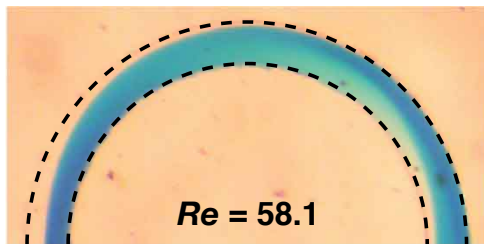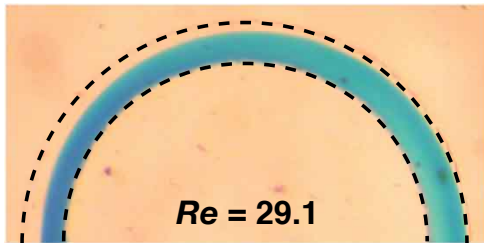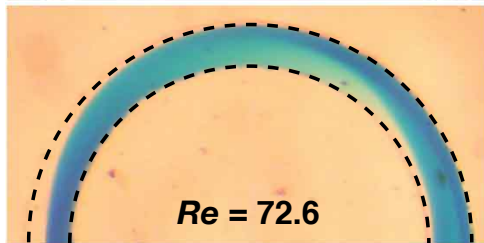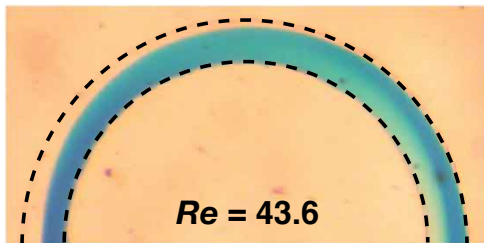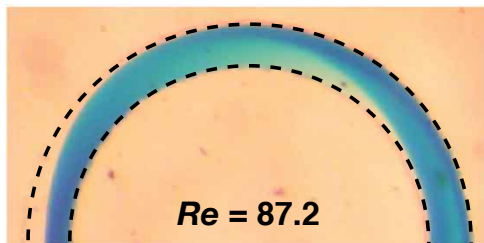

Supplement: pnas_0507976103_2.pdf [file pnas_0507976103_2.pdf]

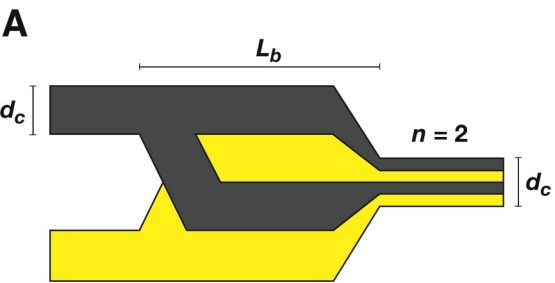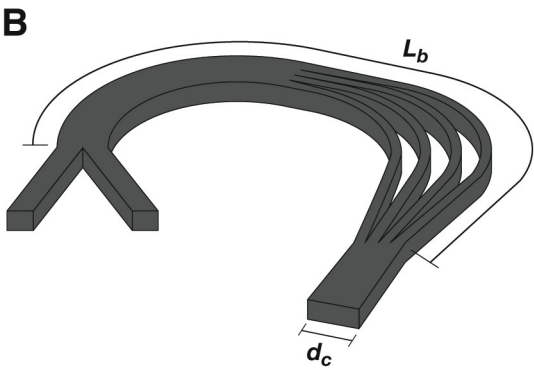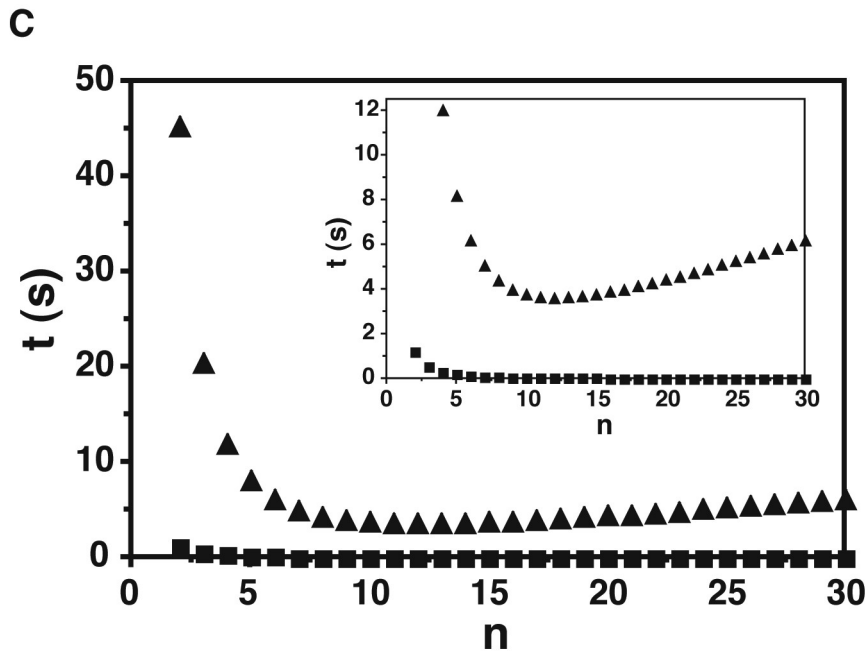

Supplement: pnas_0507976103_3.pdf [file pnas_0507976103_3.pdf]

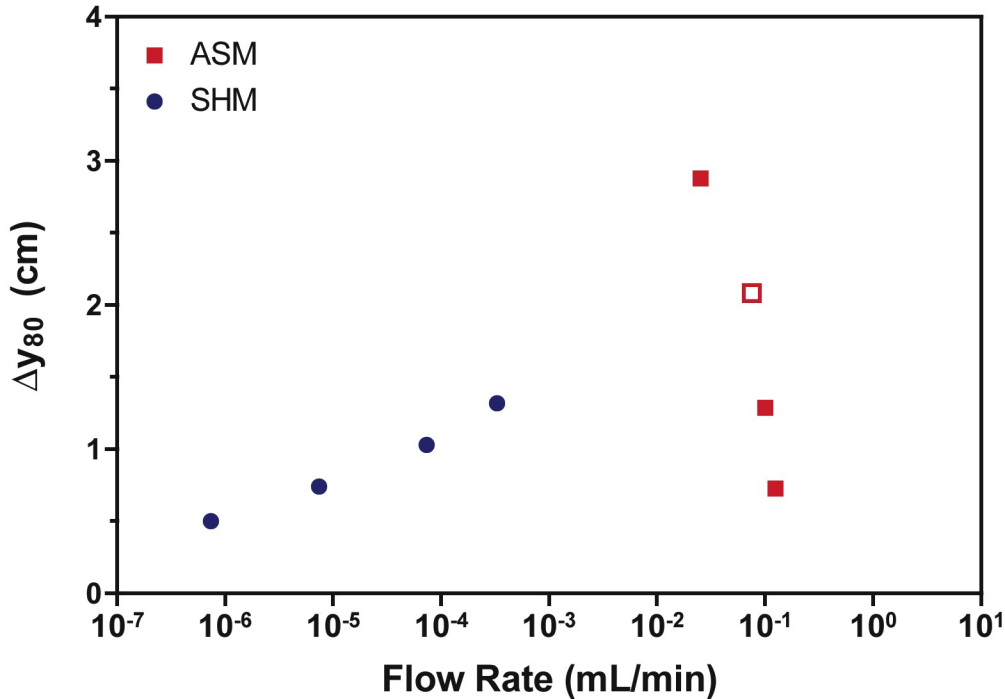

Supplement: pnas_0507976103_4.pdf [file pnas_0507976103_4.pdf]
